# Supplementary material for: Resistome Profiles, Plasmid Typing, and Whole-Genome Phylogenetic Tree Analyses of BlaNDM-9 and Mcr-1 Co-Harboring Escherichia coli ST617 from a Patient without a History of Farm Exposure in Korea
Source: MDPI journal article supplement (doi:10.3390/pathogens8040212), 2019-10-31
Supplement: s1 [file s1]

1 **Supplementary Data:**

2 **Table S1.** Primer sequences used for confirming the resistance genes and plasmid replicon types

| Primer                              | Sequence (5'→3')       | Target length (bp) |
|-------------------------------------|------------------------|--------------------|
| <i>bla</i> <sub>NDM-9</sub> _Fwd    | AGGCGTTAGATTGGCTTAC    | 1207               |
| <i>bla</i> <sub>NDM-9</sub> _Rev    | CATCGAGATCATCCAACCG    |                    |
| <i>bla</i> <sub>CTX-M-55</sub> _Fwd | CGGAAGGAGAACCAGGAAC    | 945                |
| <i>bla</i> <sub>CTX-M-55</sub> _Rev | CTGTTGTTAGGAAGTGTGCC   |                    |
| <i>bla</i> <sub>TEM-1B</sub> _Fwd   | AGTGGGTTACATCGAACTGG   | 645                |
| <i>bla</i> <sub>TEM-1B</sub> _Rev   | ACGATACGGGAGGGCTTAC    |                    |
| <i>mcr-1</i> _Fwd                   | GACGGCAAGATTCTTGAGGC   | 2165               |
| <i>mcr-1</i> _Rev                   | CTCATCTCAGCAAGTAGGCG   |                    |
| <i>aph</i> (3')- <i>lia</i> _Fwd    | GAACAAGATGGATTGCACGC   | 781                |
| <i>aph</i> (3')- <i>lia</i> _Rev    | AGAACTCGTCAAGAAGGCG    |                    |
| <i>aph</i> (3') <i>lb</i> _Fwd      | ATCGCATTCTGACTGGTTGC   | 750                |
| <i>aph</i> (3') <i>lb</i> _Rev      | TCGCAGATAGAAGGCAAGGC   |                    |
| <i>aph</i> (6)- <i>ld</i> _Fwd      | AACCTGTTCTCATTGCGGAC   | 793                |
| <i>aph</i> (6)- <i>ld</i> _Rev      | TAGTATGACGTCTGTGCGCAC  |                    |
| <i>aadA2</i> _Fwd                   | CTTGATGATCTCGCCTTTCAC  | 763                |
| <i>aadA2</i> _Rev                   | ACCATCGAAATTTCAACCAAC  |                    |
| <i>oqxA</i> _Fwd                    | ATCAGTTAAGGGTGGCGC     | 1177               |
| <i>oqxA</i> _Rev                    | ATGAGCCTGCAAAAAACCTG   |                    |
| <i>oqxB</i> _Fwd                    | CCAAACAGGCGATCGATCAG   | 1360               |
| <i>oqxB</i> _Rev                    | GCTGGAGGAAGCGATCAAC    |                    |
| <i>fosA3</i> _Fwd                   | GCTGAACTAACCCGTCAATC   | 379                |
| <i>fosA3</i> _Rev                   | CCTGGCATTTTATCAGCAGT   |                    |
| <i>mph</i> (A)_Fwd                  | ATGACCGTAGTCACGACCG    | 865                |
| <i>mph</i> (A)_Rev                  | CTTCGTTACCCGAGTCGAG    |                    |
| <i>mdf</i> (A)_Fwd                  | GGCCGTGGTGGAAACAATATC  | 825                |
| <i>mdf</i> (A)_Rev                  | CATCCATAAATACGCGTGCG   |                    |
| <i>floR</i> _Fwd                    | TGATGGCTCCTTTTCGACATC  | 1164               |
| <i>floR</i> _Rev                    | GTTAGACGACTGGCGACTTC   |                    |
| <i>sul2</i> _Fwd                    | ACCGCAAACAGGTTACTCGC   | 1168               |
| <i>sul2</i> _Rev                    | GAGAAATATCCCGAATGTGCAG |                    |
| <i>tet</i> (A)_Fwd                  | TGTGCAACGGGAATTTGAAG   | 1259               |
| <i>tet</i> (A)_Rev                  | AGAATCCGCGCGTTCAATC    |                    |
| <i>dfrA12</i> _Fwd                  | GACGCGCATAAACGGAGTG    | 488                |
| <i>dfrA12</i> _Rev                  | ATGAACTCGGAATCAGTACGC  |                    |
| <i>rmtB</i> _Fwd                    | GCCATGGCACTTTTACAATC   | 730                |
| <i>rmtB</i> _Rev                    | TATAAGTTCTGTTCCGATGGTC |                    |
| <i>IncB</i> _Fwd                    | TGAAAAACAGGGGGAGCAAG   | 1312               |
| <i>IncB</i> _Rev                    | TGCAGTGGCTTTTGGGATC    |                    |
| <i>IncFII</i> _Fwd                  | ATGTCGCAGACAGAAAATGC   | 1397               |
| <i>IncFII</i> _Rev                  | CTGTAATTGCGGTTACGTGAC  |                    |
| <i>IncI2</i> _Fwd                   | GTGTGAGTGGGTGTATGCAG   | 1467               |
| <i>IncI2</i> _Rev                   | CTGTCAGGGCCAGTTCAAG    |                    |
| <i>IncN</i> _Fwd                    | AGCAGGATCAAGGAAAGATCG  | 560                |
| <i>IncN</i> _Rev                    | GCTGCTTACTACCTCTCGC    |                    |

|           |                         |      |
|-----------|-------------------------|------|
| IncY_Fwd  | GTTTCCTTCCAACCGGCTTTG   | 1189 |
| IncY_Rev  | CCTCCAGCACACACTTATTCG   |      |
| IncR_Fwd  | ACCGACTATTTGCAACAGTG    | 561  |
| IncR_Rev  | ATGGGAAAGAGGTCAAGTTC    |      |
| IncX1_Fwd | TCATTGCTGGCTTATCTCGC    | 477  |
| IncX1_Rev | GTCCGTTTTGAGATCGAAATGAG |      |
