# Supplementary material for: Resistome Profiles, Plasmid Typing, and Whole-Genome Phylogenetic Tree Analyses of BlaNDM-9 and Mcr-1 Co-Harboring Escherichia coli ST617 from a Patient without a History of Farm Exposure in Korea
Source: MDPI journal article supplement (doi:10.3390/pathogens8040212), 2019-10-31
Supplement: s1 [file s1]

1 **Supplementary Data:**

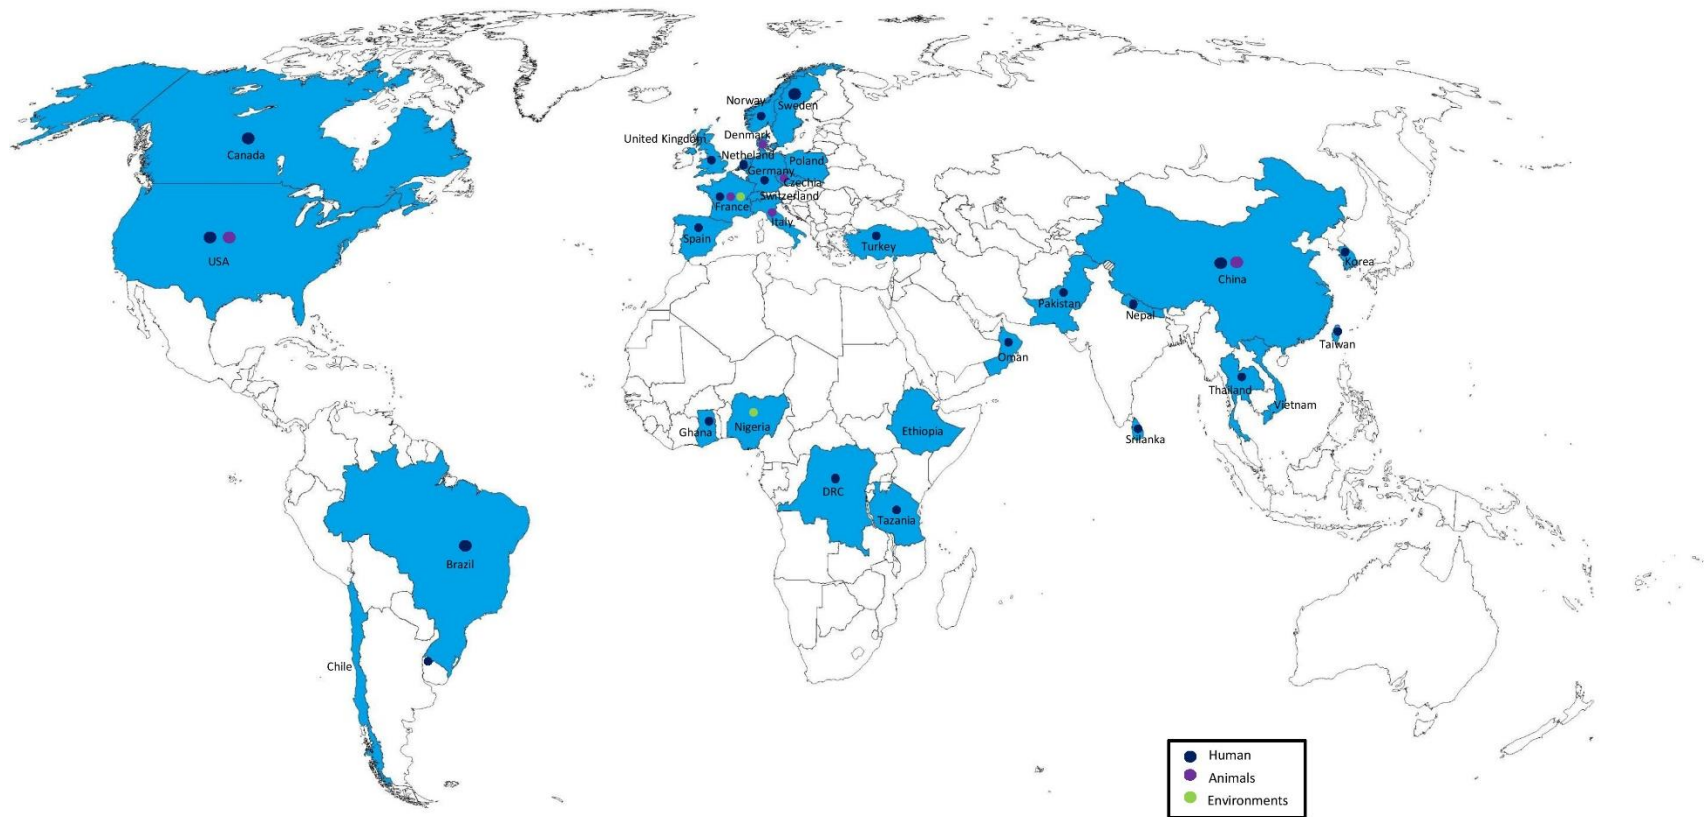

2

3 Figure S1. Global distribution of *E. coli* ST617. The countries where *E. coli* ST617 has been detected are coloured in blue. Human,  
4 animals and environmental-related sources are indicated in dark blue, violet and light green circle, respectively.
