# Supplementary material for: Resistome Profiles, Plasmid Typing, and Whole-Genome Phylogenetic Tree Analyses of BlaNDM-9 and Mcr-1 Co-Harboring Escherichia coli ST617 from a Patient without a History of Farm Exposure in Korea
Source: MDPI journal article supplement (doi:10.3390/pathogens8040212), 2019-10-31
Supplement: s1 [file s1]

Supplementary Data:

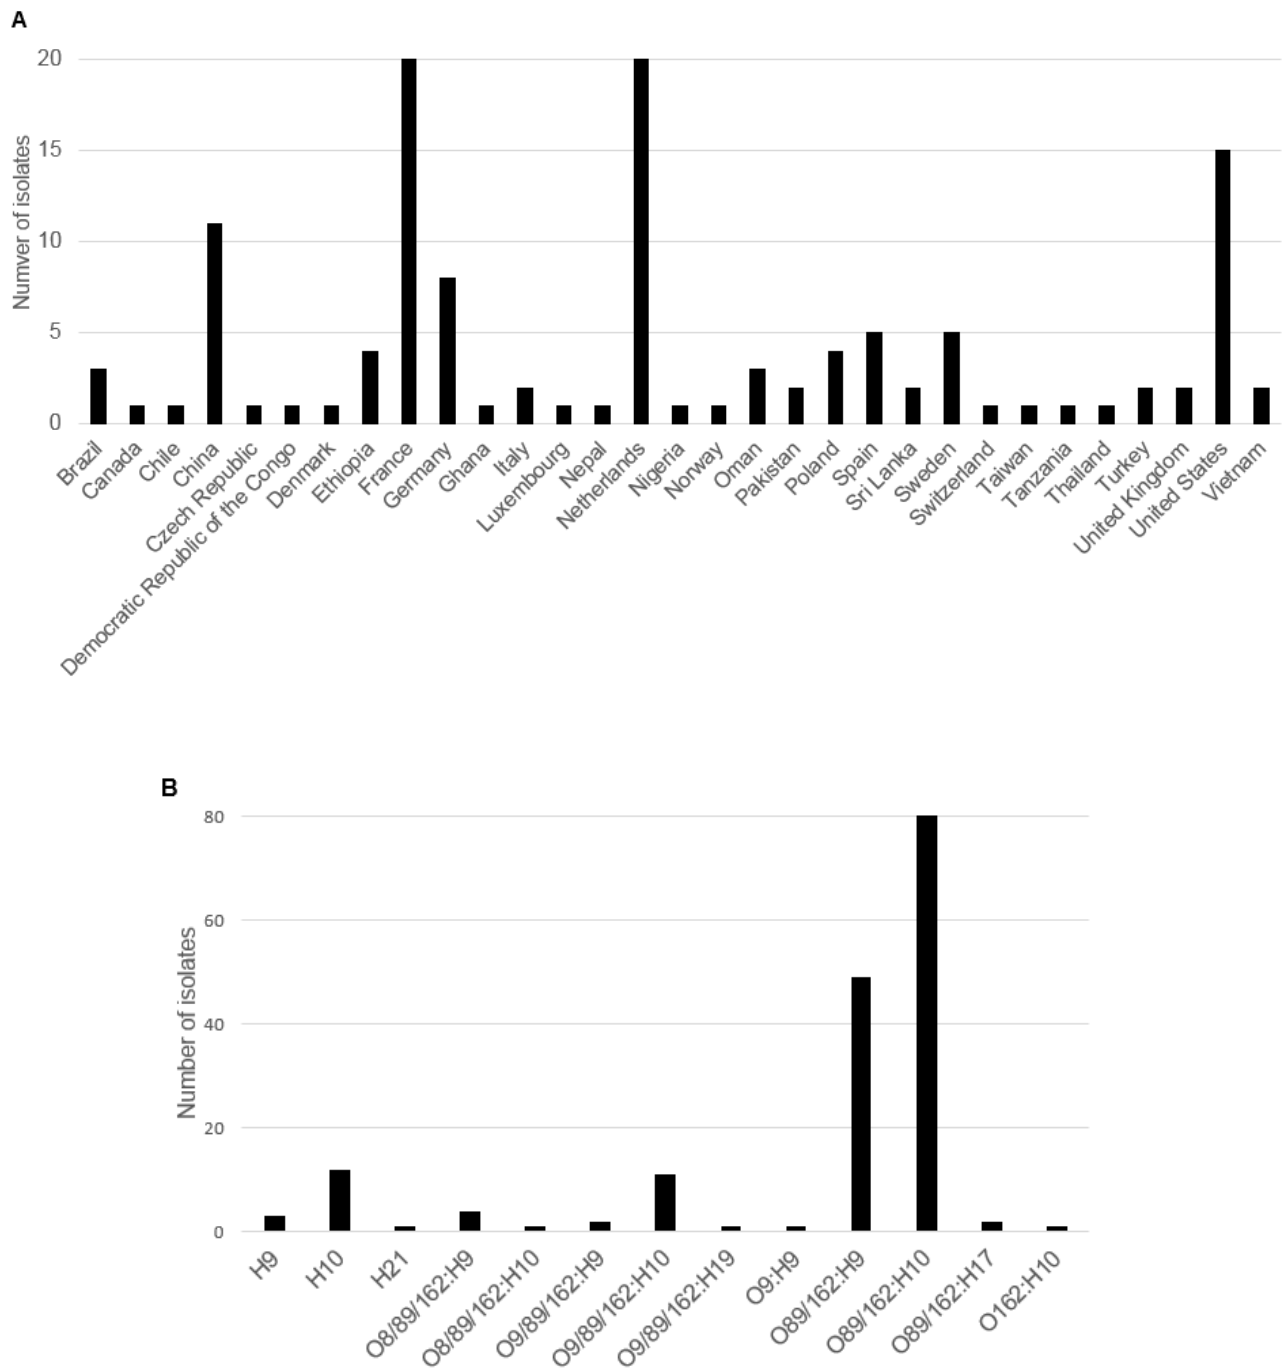

Figure S2. (A) Distribution of *E. coli* ST 617 among countries. (B) Distribution of serotypes among *E. coli* ST 617. All the data were collected and analyzed from EnteroBase (<http://enterobase.warnick.ac.uk/>)
